# Supplementary material for: The Soybean High Density ‘Forrest’ by ‘Williams 82’ SNP-Based Genetic Linkage Map Identifies QTL and Candidate Genes for Seed Isoflavone Content
Source: MDPI journal article supplement (doi:10.3390/plants10102029), 2021-09-27
Supplement: s1 [file s1]

Supplementary Tables and Figures.

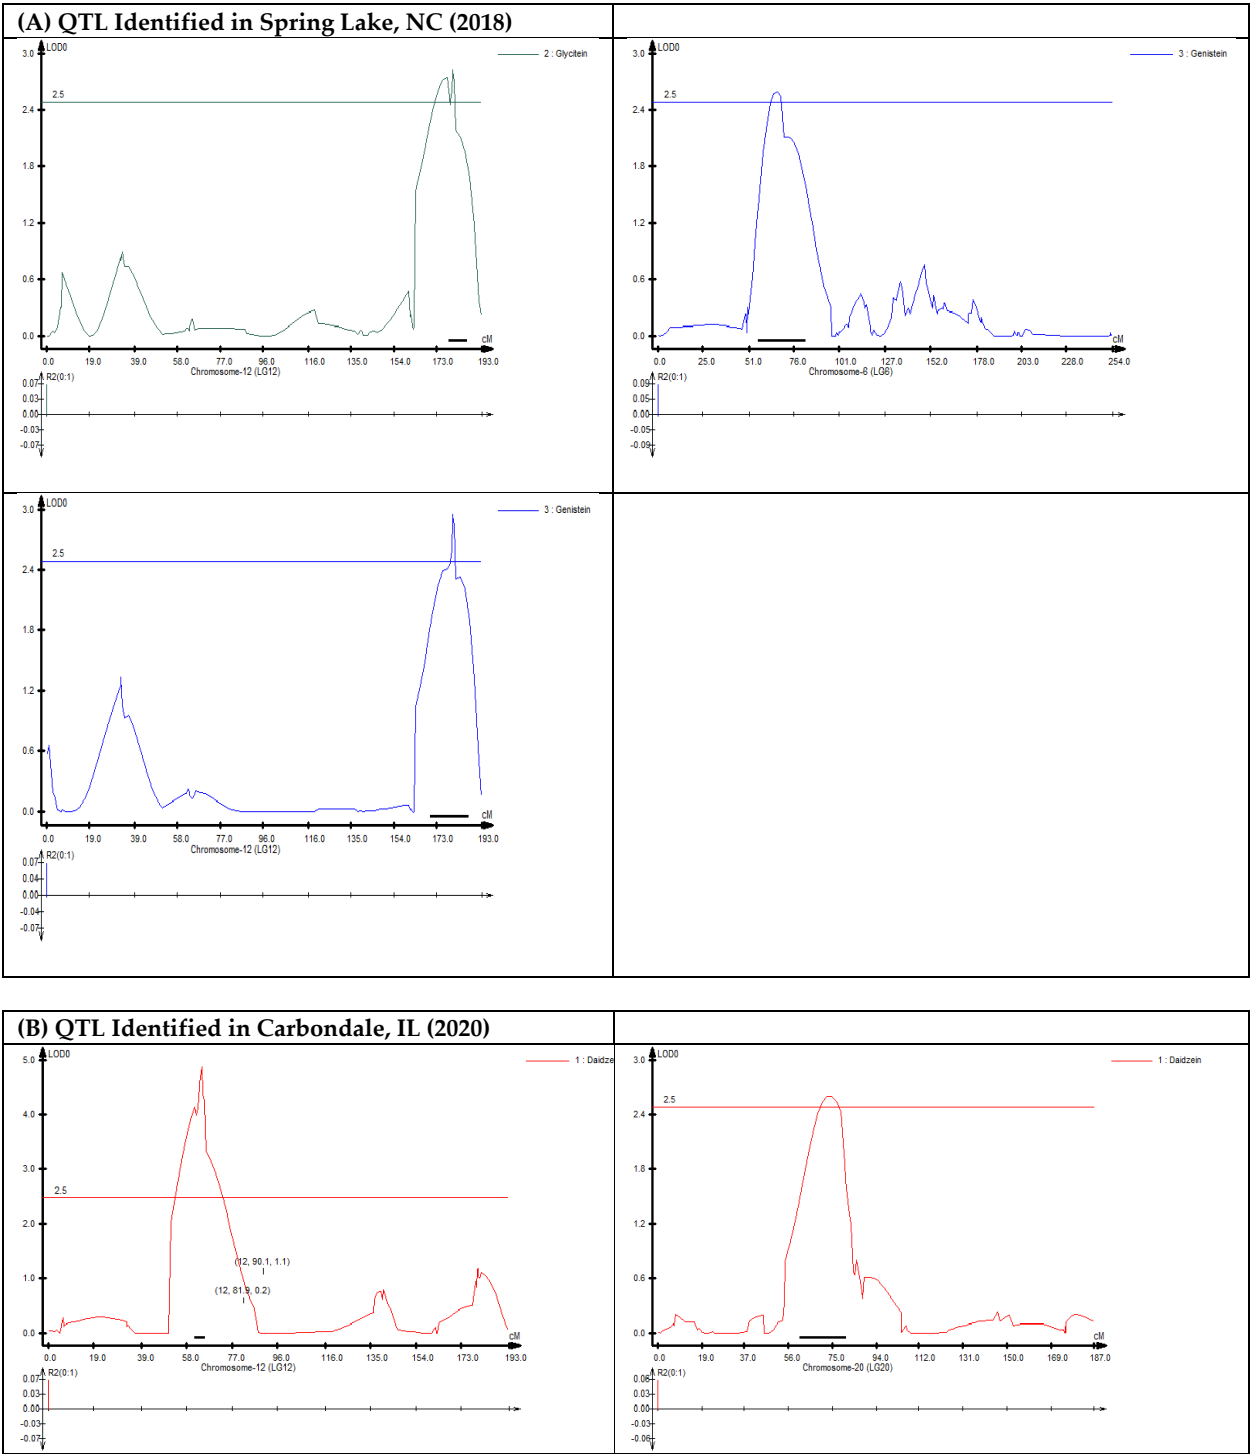

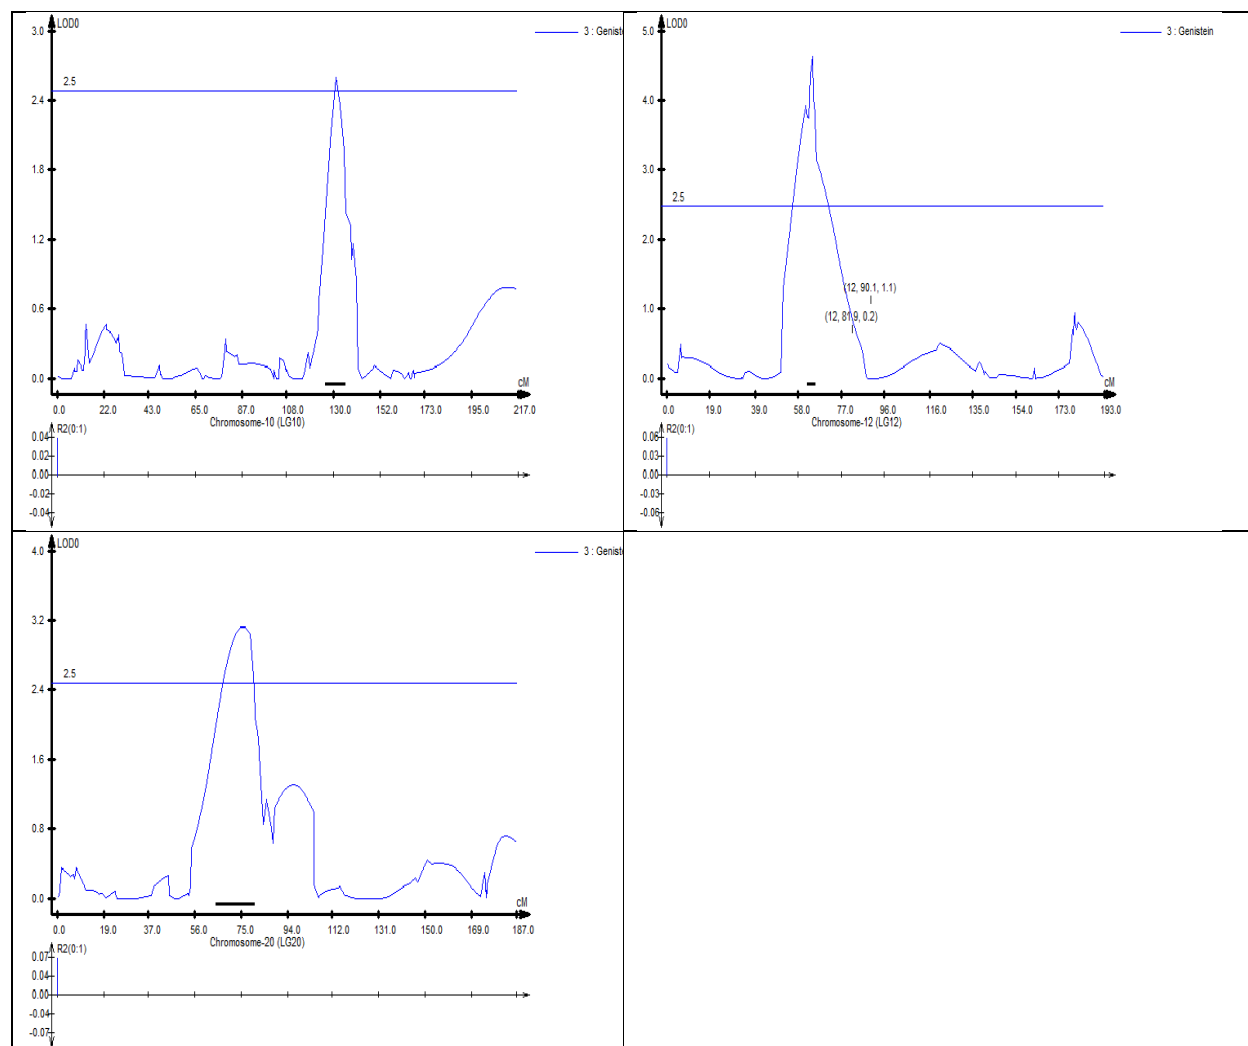

**Figure S1.** Positions of major QTL (LOD > 2.5) that control seed genistein (qGEN), daidzein (qDAID), and glycitein (qGLY) contents identified in the FXW82 RIL population. (A) QTL identified in Spring Lake, NC (2018) and (B) QTL identified in Carbondale, IL (2020).



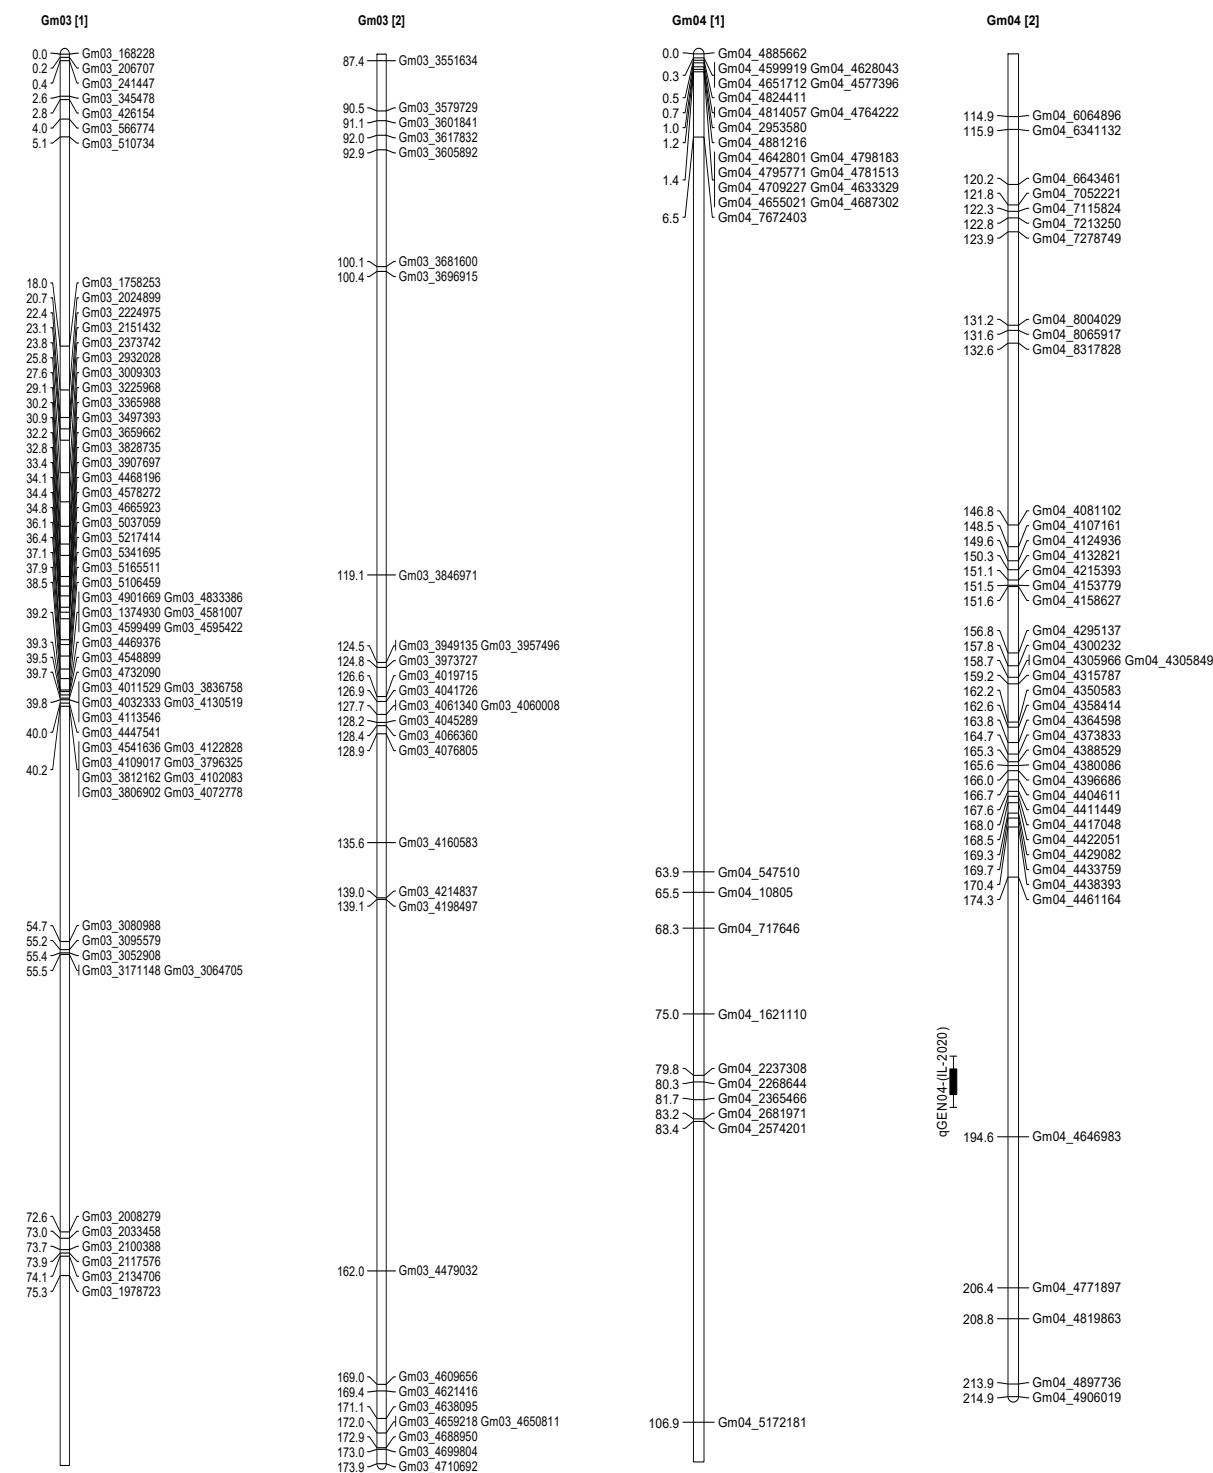

Figure S2. Continued.

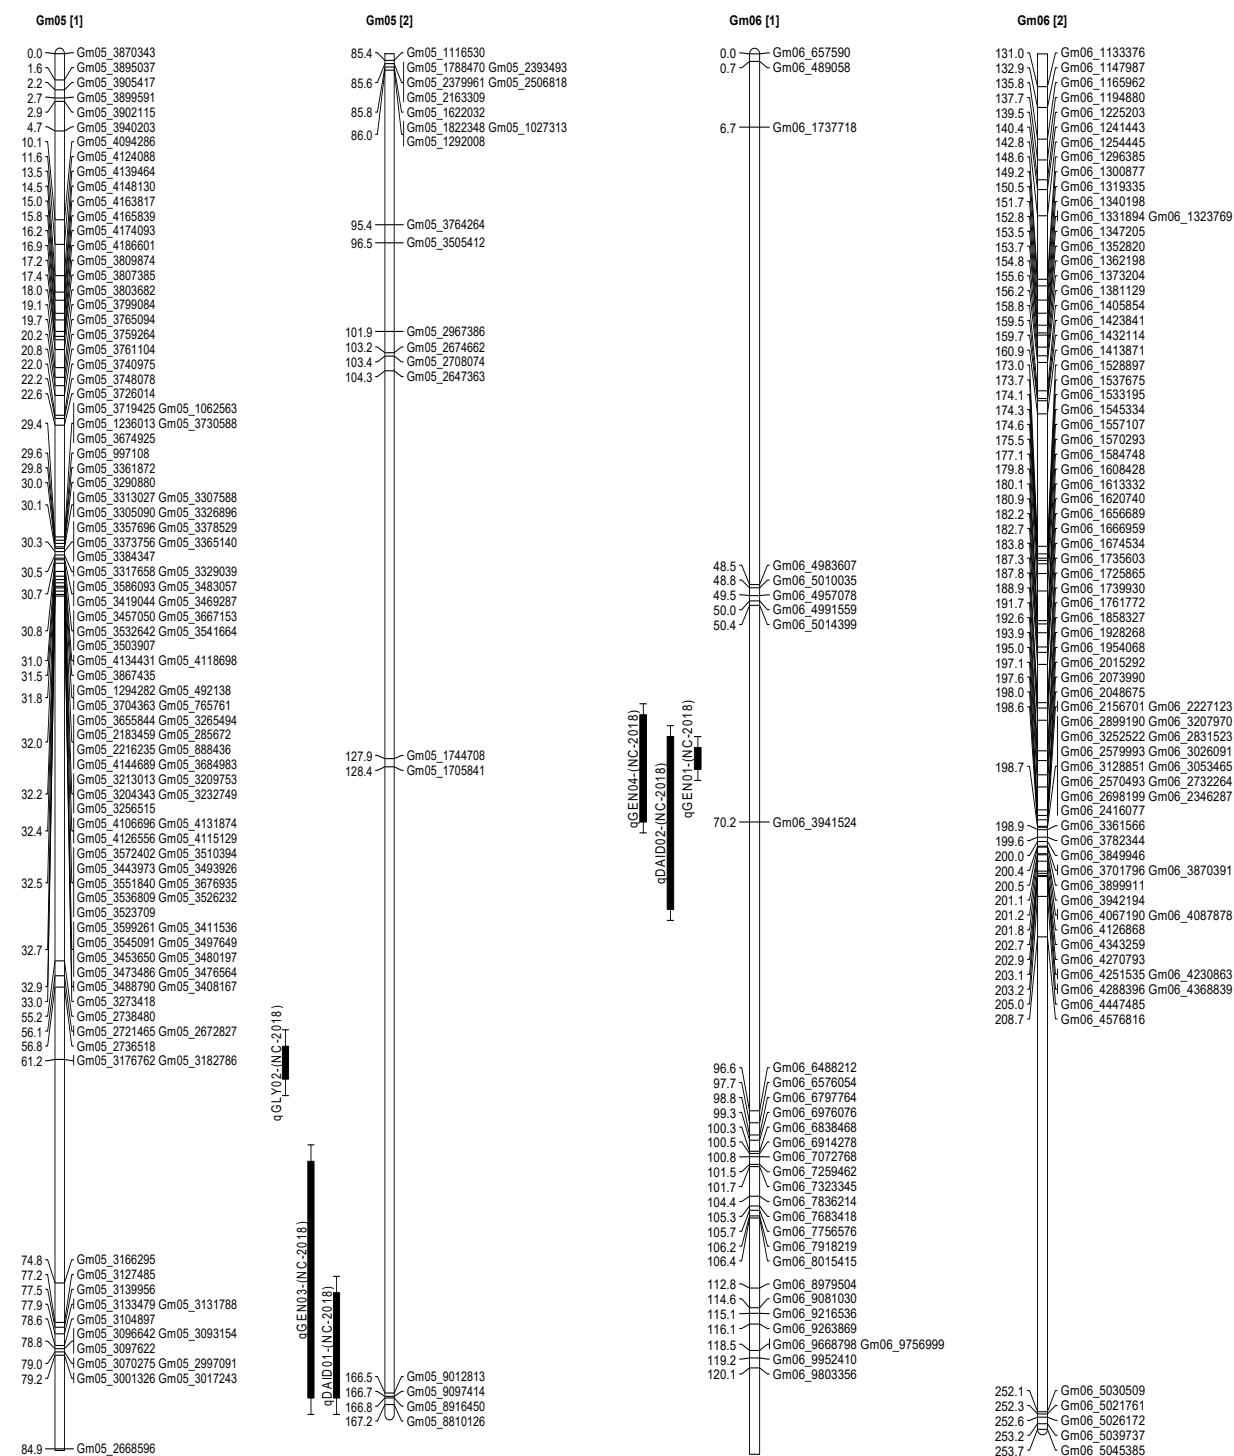

**Figure S2. Continued.**

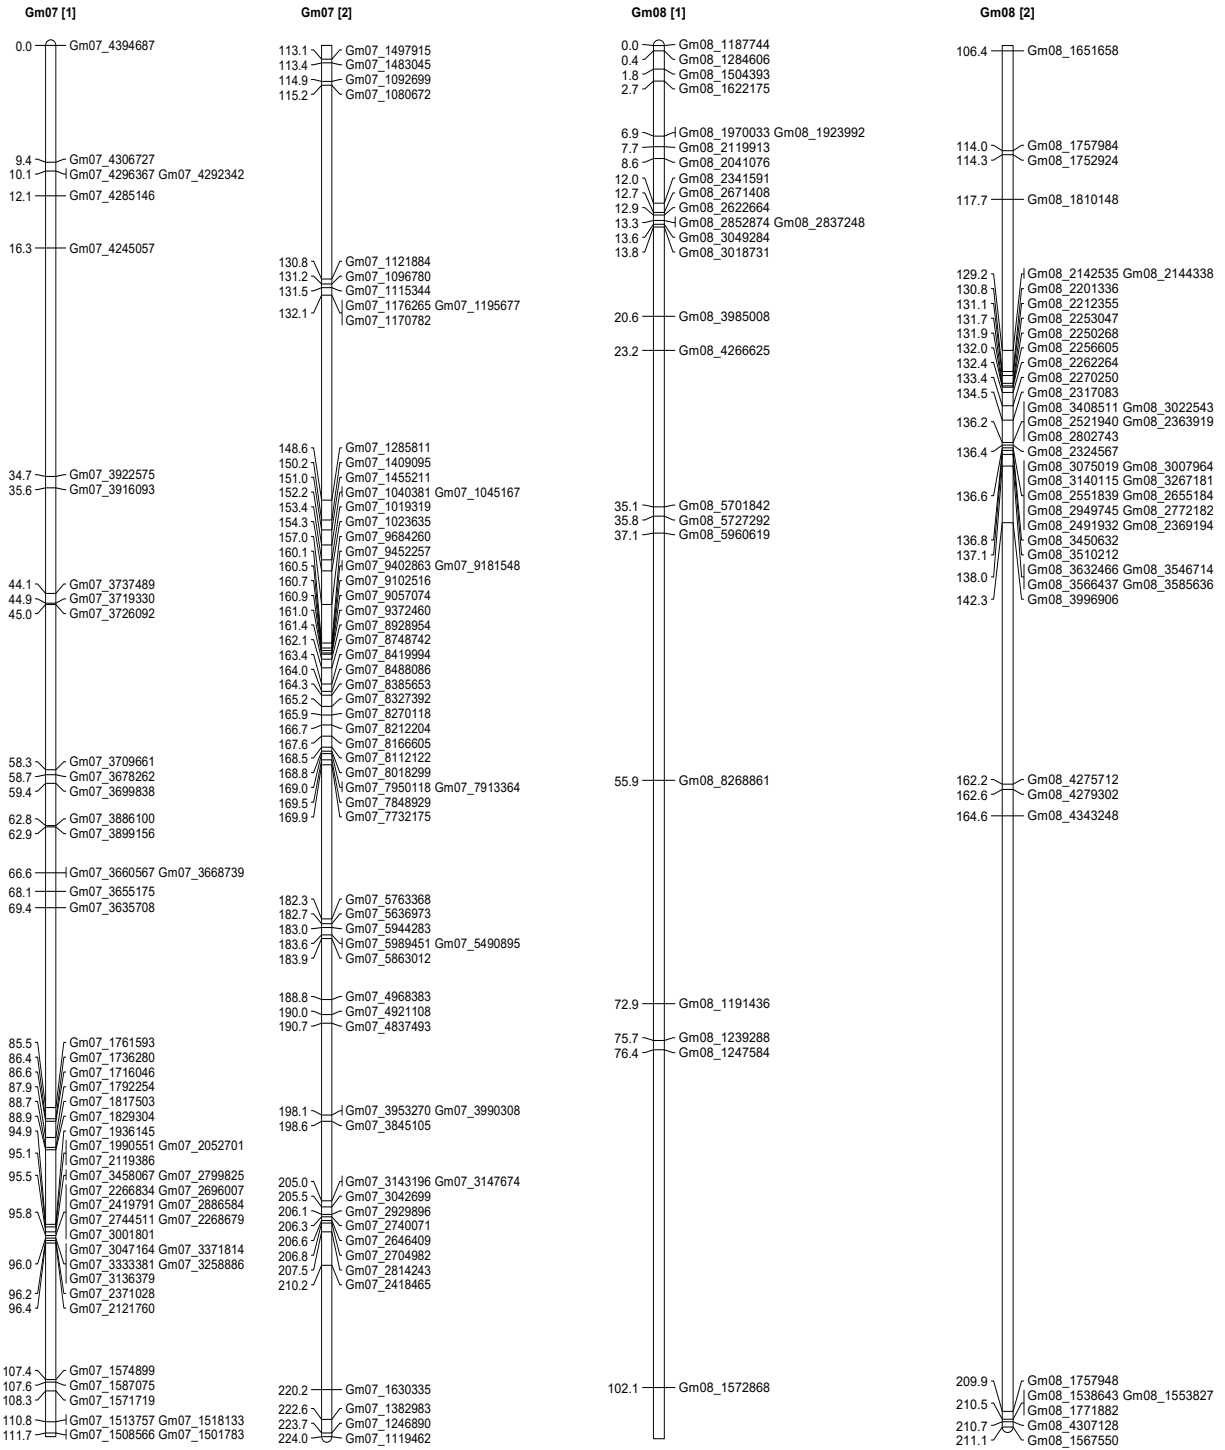

Figure S2. Continued.

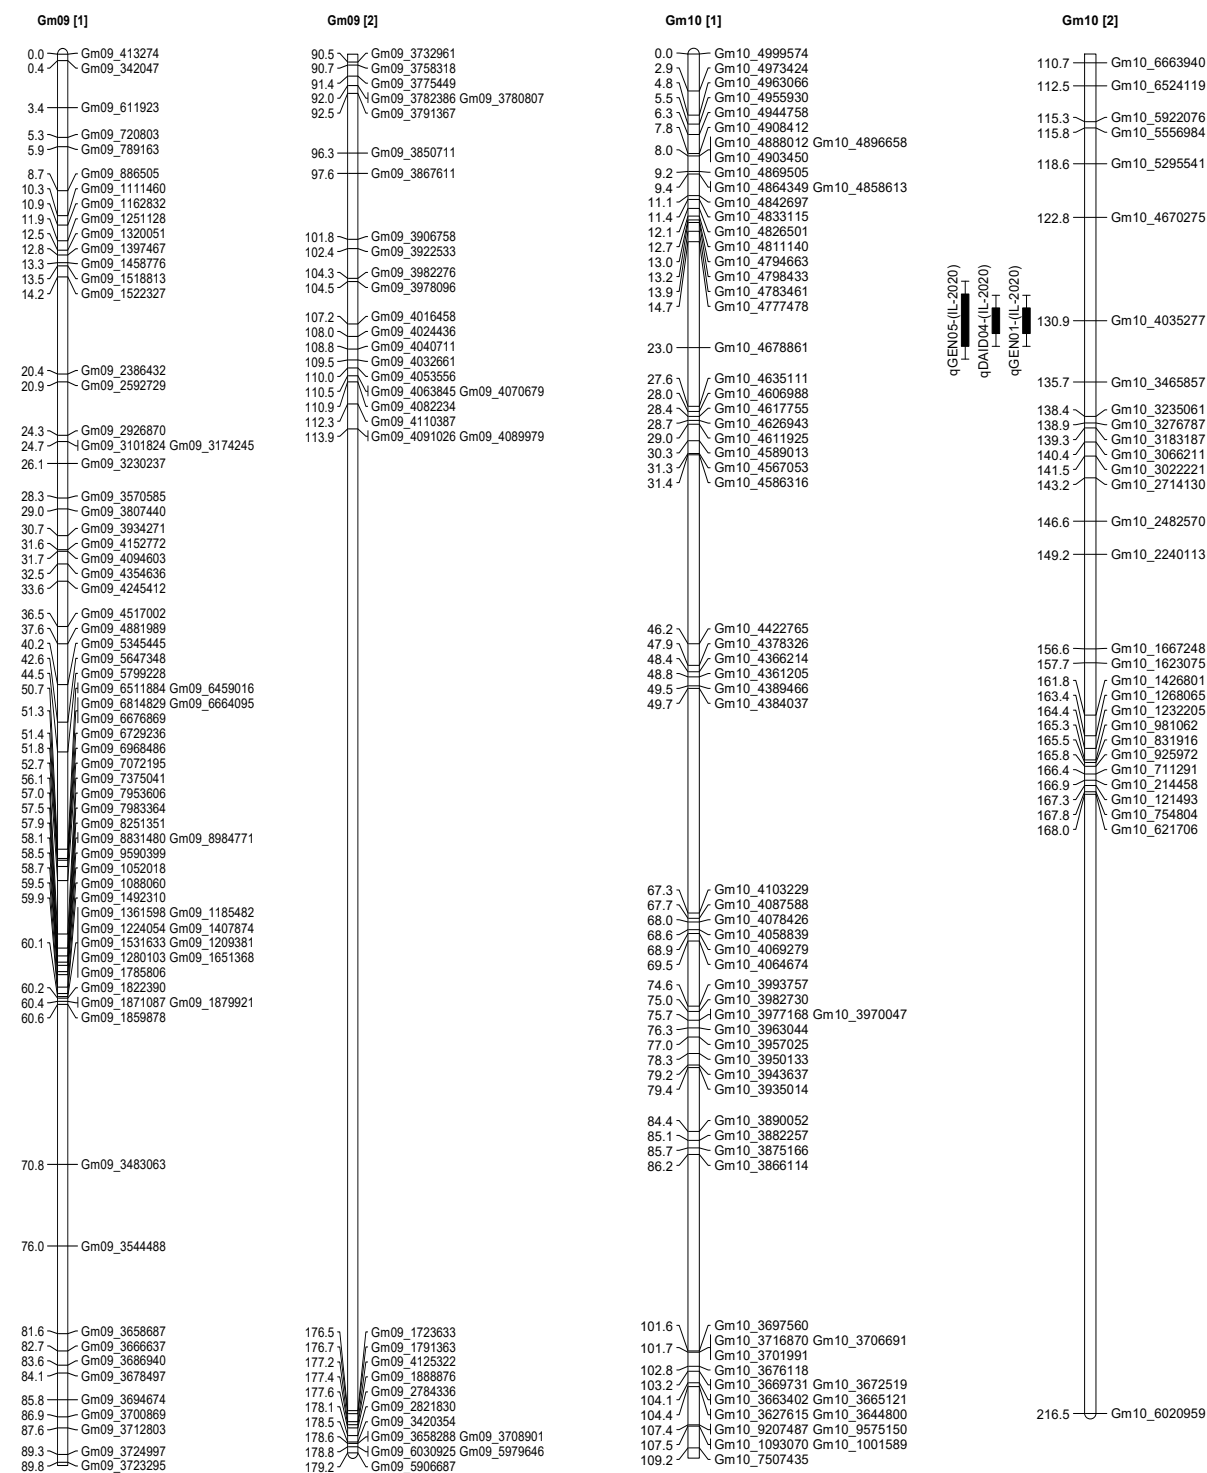

Figure S2. Continued.

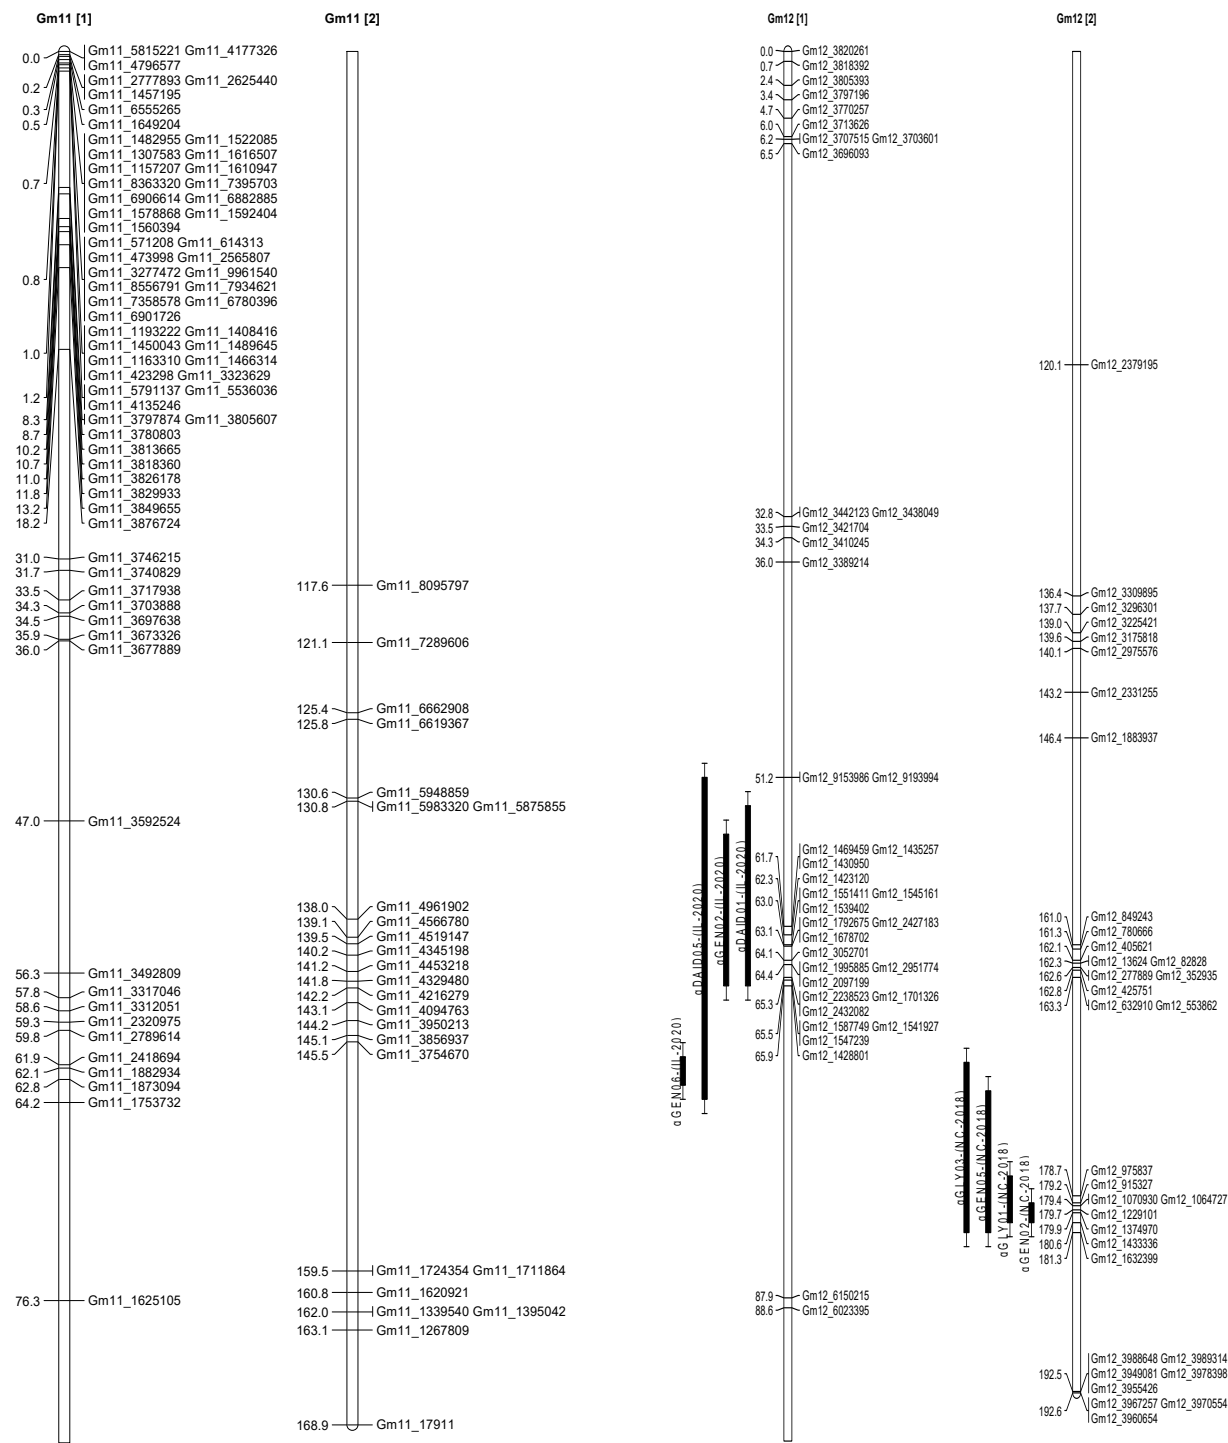

Figure S2. Continued.



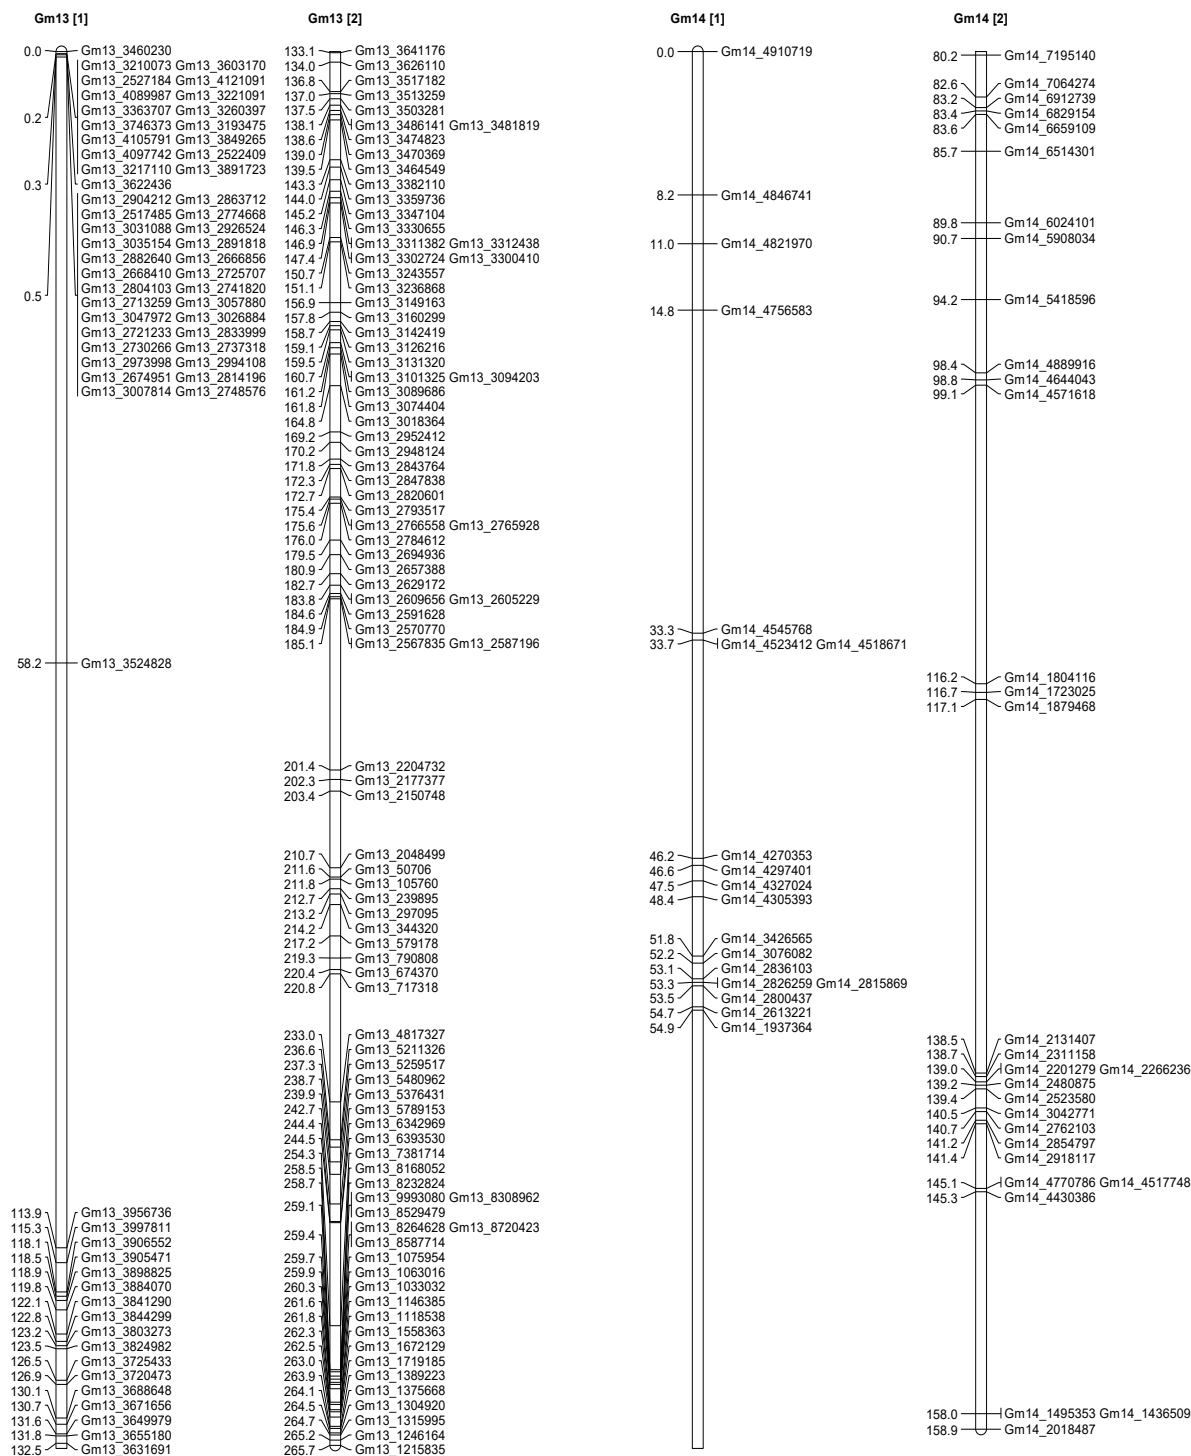

Figure S2. Continued.

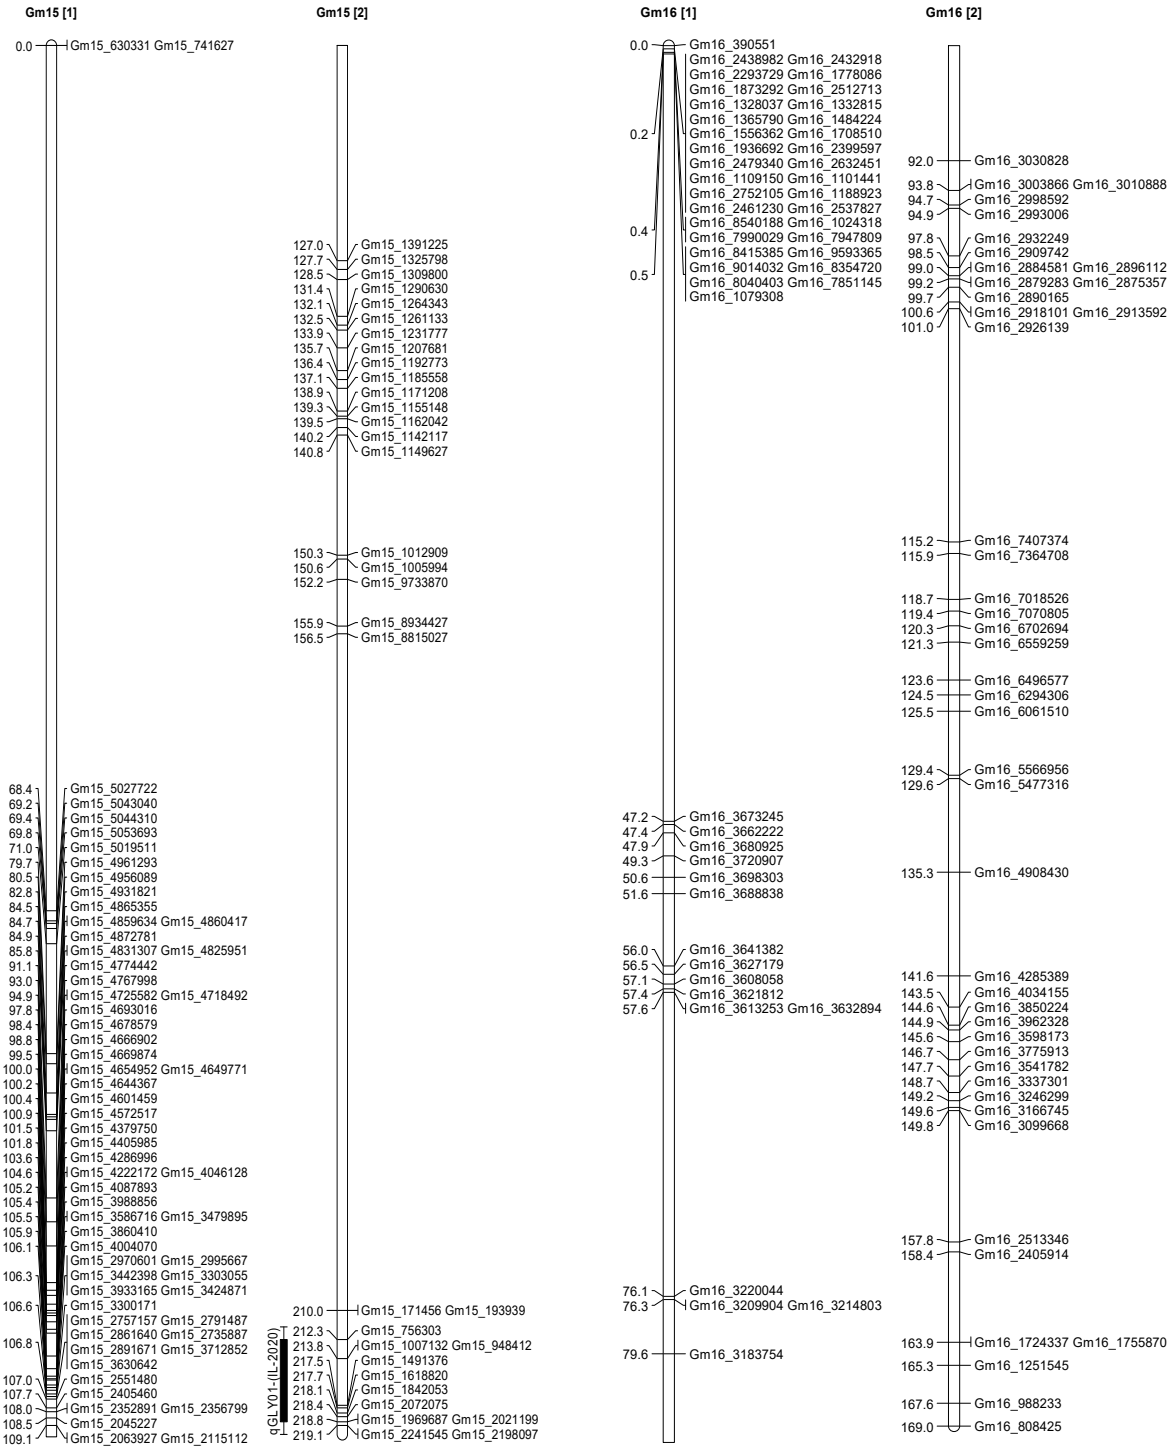

Figure S2. Continued.

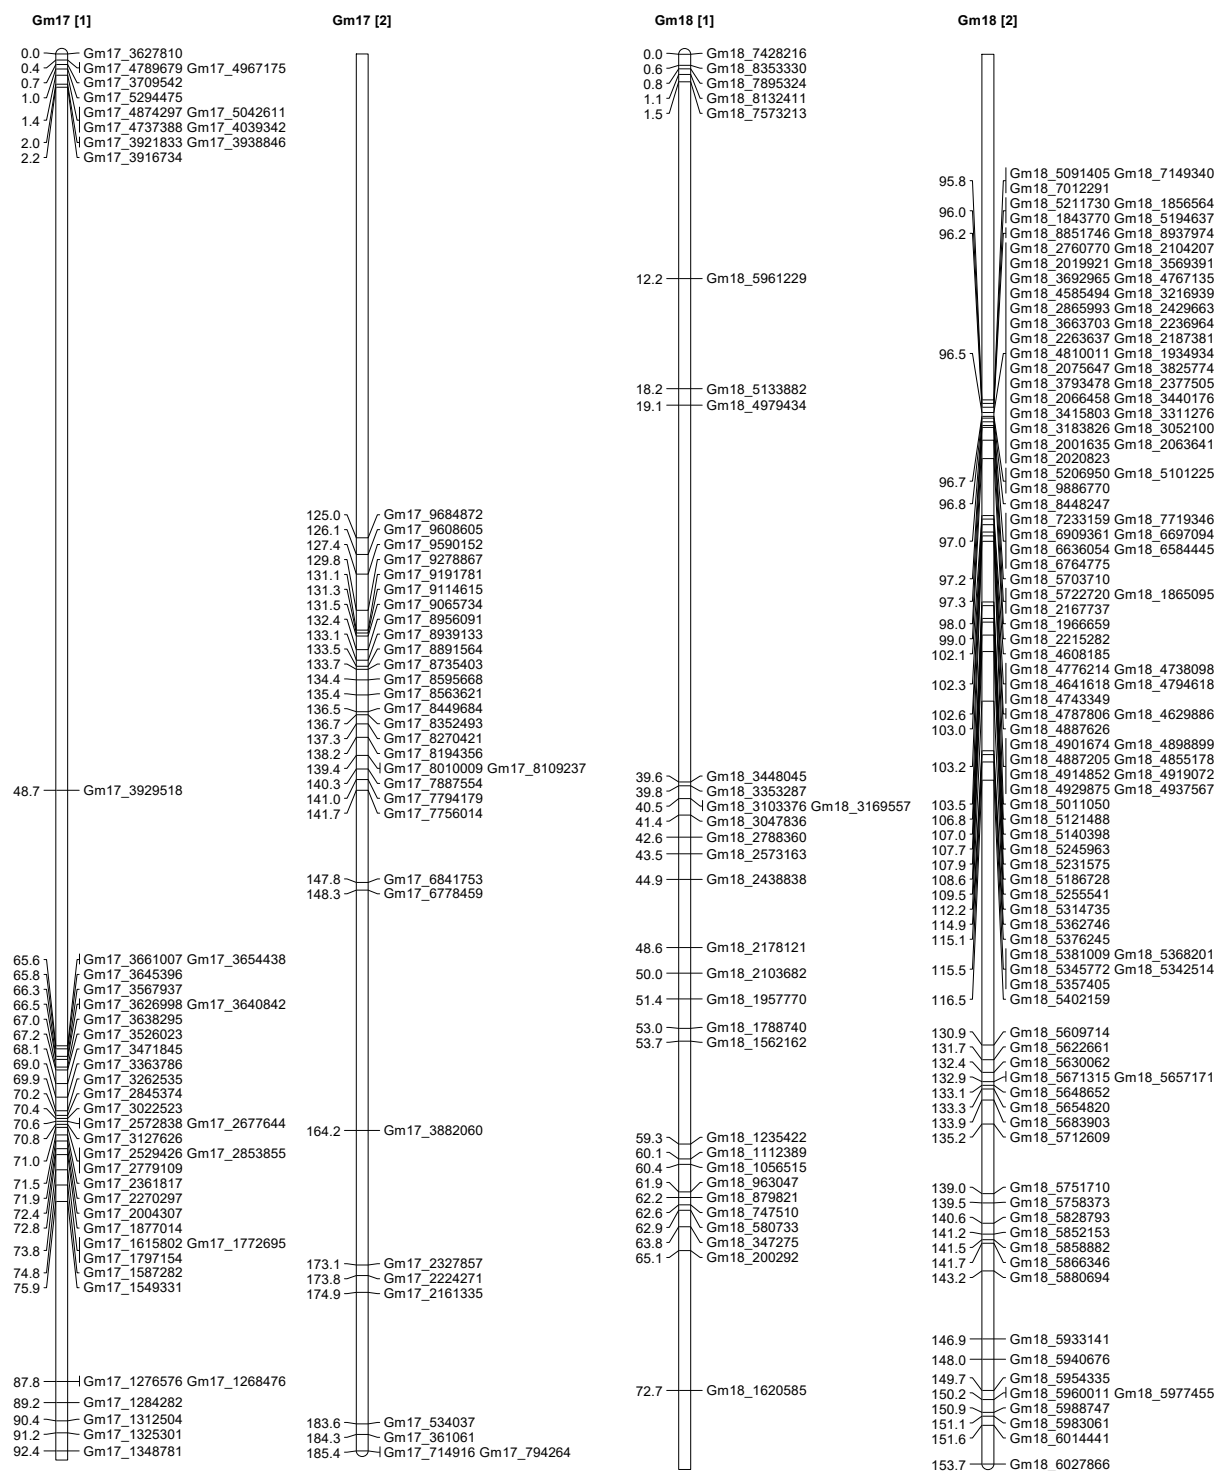

Figure S2. Continued.

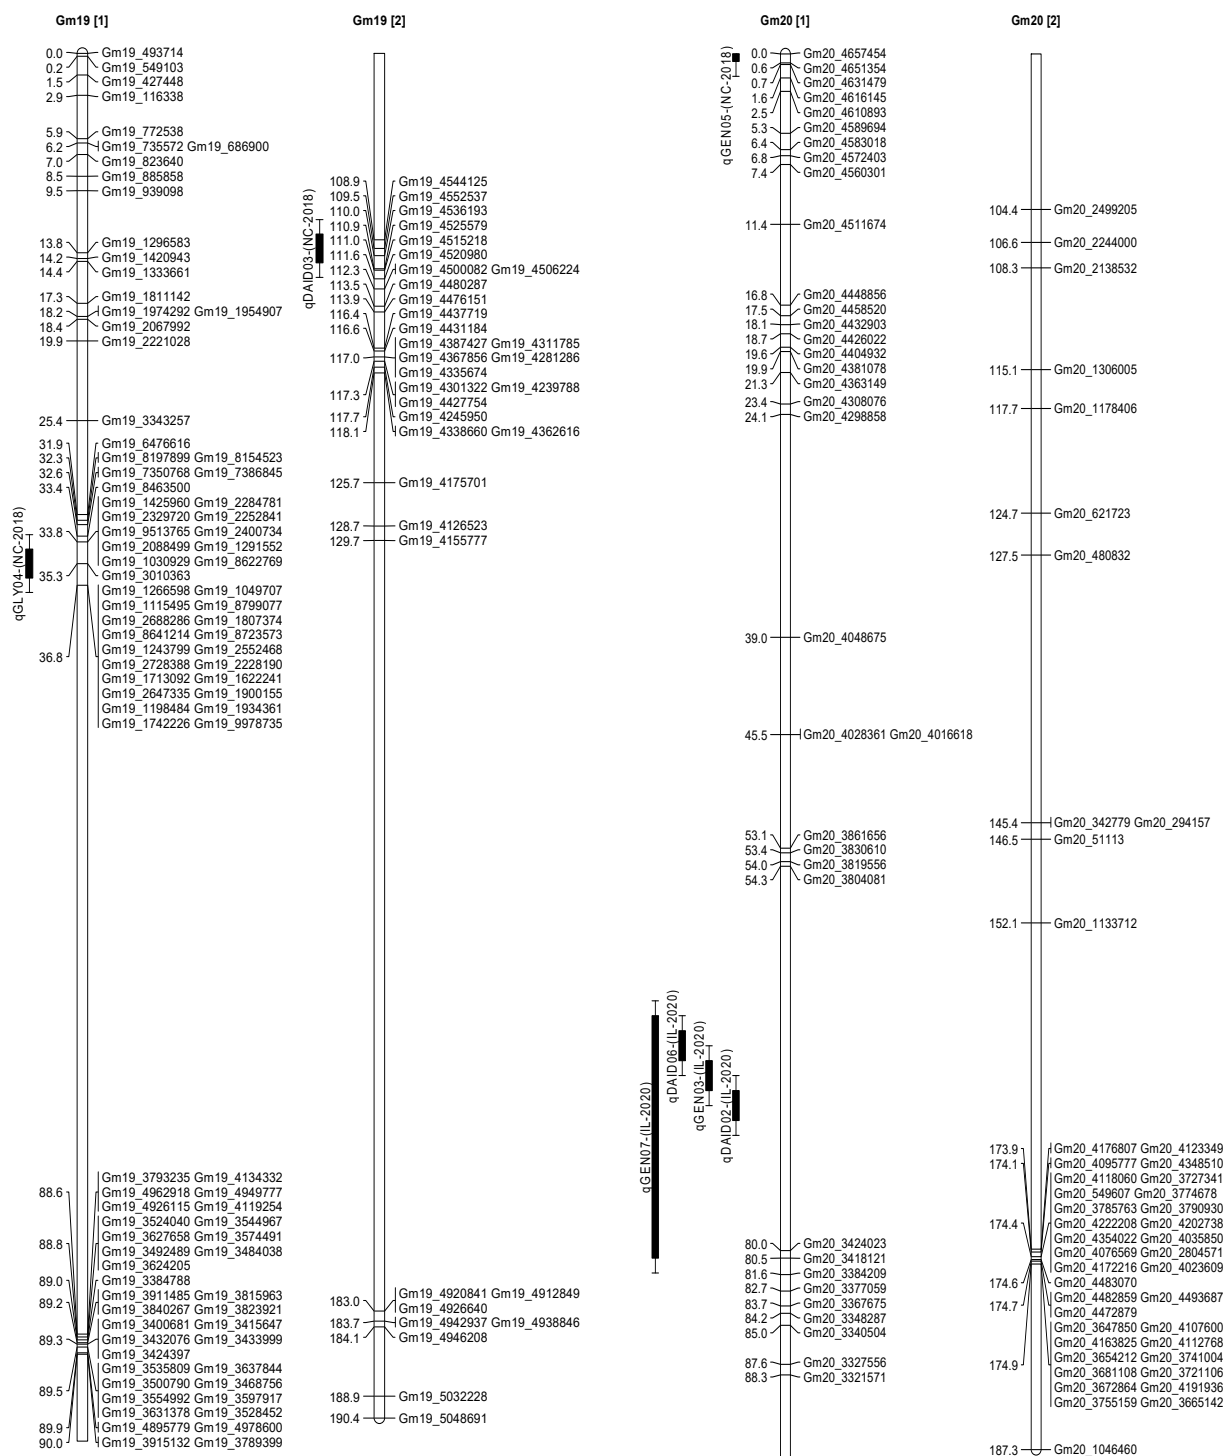

Figure S2. Continued.

**Table S1.** Candidate genes involved in soybean isoflavone biosynthetic pathways and their Phytozome annotation. These 130 candidate genes are identified in all 20 chrs.

| Soybean Gene    | Phytozome Annotation                                                                | Chr   | Start    | End      |
|-----------------|-------------------------------------------------------------------------------------|-------|----------|----------|
| Glyma.01G239300 | 2-hydroxyisoflavanone dehydratase                                                   | Chr01 | 56350646 | 56352389 |
| Glyma.01G239500 | 2-hydroxyisoflavanone dehydratase                                                   | Chr01 | 56360162 | 56361708 |
| Glyma.01G239400 | 2-hydroxyisoflavanone dehydratase                                                   | Chr01 | 56356064 | 56357252 |
| Glyma.20G143400 | 2-hydroxyisoflavanone dehydratase                                                   | Chr20 | 38199806 | 38201866 |
| Glyma.10G250200 | 2-hydroxyisoflavanone dehydratase                                                   | Chr10 | 47837207 | 47839071 |
| Glyma.01G239600 | 2-hydroxyisoflavanone dehydratase (HID)                                             | Chr01 | 56367073 | 56368854 |
| Glyma.13G173400 | 2-hydroxyisoflavanone synthase / Isoflavonoid synthase                              | Chr13 | 28738547 | 28739205 |
| Glyma.11G070500 | 2'-hydroxyisoflavone reductase                                                      | Chr11 | 5273807  | 5275911  |
| Glyma.01G172900 | 2'-hydroxyisoflavone reductase                                                      | Chr01 | 51020276 | 51025649 |
| Glyma.01G172600 | 2'-hydroxyisoflavone reductase                                                      | Chr01 | 50980302 | 50982573 |
| Glyma.10G292200 | 3,9-dihydroxypterocarpan 6A-monooxygenase / 3,9-dihydroxypterocarpan 6A-hydroxylase | Chr10 | 51006927 | 51009538 |
| Glyma.19G144700 | 3,9-dihydroxypterocarpan 6A-monooxygenase / 3,9-dihydroxypterocarpan 6A-hydroxylase | Chr19 | 40579736 | 40582424 |
| Glyma.02G067900 | 4'-methoxyisoflavone 2'-hydroxylase / Isoflavone 2'-monooxygenase                   | Chr02 | 5986285  | 5987684  |
| Glyma.08G089500 | 4'-methoxyisoflavone 2'-hydroxylase / Isoflavone 2'-monooxygenase                   | Chr08 | 6765669  | 6768017  |
| Glyma.20G241500 | chalcone isomerase (E5.5.1.6)                                                       | Chr20 | 47259311 | 47261877 |
| Glyma.13G262500 | Chalcone isomerase / Chalcone--flavanone isomerase                                  | Chr13 | 36603843 | 36608523 |
| Glyma.20G241600 | chalcone isomerase                                                                  | Chr20 | 47264269 | 47266795 |
| Glyma.20G241700 | chalcone isomerase                                                                  | Chr20 | 47267106 | 47268550 |
| Glyma.19G105100 | chalcone synthase (CHS)                                                             | Chr19 | 35466392 | 35469297 |
| Glyma.09G075200 | chalcone synthase (CHS)                                                             | Chr09 | 8145494  | 8147595  |
| Glyma.11G011500 | chalcone synthase (CHS)                                                             | Chr11 | 802453   | 804663   |
| Glyma.02G130400 | chalcone synthase (CHS)                                                             | Chr02 | 13399253 | 13401493 |
| Glyma.01G091400 | chalcone synthase (CHS)                                                             | Chr01 | 27621455 | 27623628 |
| Glyma.08G109400 | chalcone synthase (CHS)                                                             | Chr08 | 8391364  | 8394840  |
| Glyma.08G109300 | chalcone synthase (CHS)                                                             | Chr08 | 8387509  | 8391327  |
| Glyma.08G109500 | chalcone synthase (CHS)                                                             | Chr08 | 8397944  | 8399751  |
| Glyma.08G110500 | chalcone synthase (CHS)                                                             | Chr08 | 8504479  | 8506020  |
| Glyma.01G228700 | chalcone synthase (CHS)                                                             | Chr01 | 55659010 | 55660950 |
| Glyma.05G153200 | chalcone synthase (CHS)                                                             | Chr05 | 34687009 | 34693243 |
| Glyma.06G118500 | chalcone synthase (CHS)                                                             | Chr06 | 9644661  | 9650144  |
| Glyma.08G109200 | chalcone synthase (CHS)                                                             | Chr08 | 8384742  | 8386542  |
| Glyma.08G110300 | chalcone synthase (CHS)                                                             | Chr08 | 8475793  | 8477410  |
| Glyma.08G110700 | chalcone synthase (CHS)                                                             | Chr08 | 8513952  | 8515719  |
| Glyma.08G110900 | chalcone synthase (CHS)                                                             | Chr08 | 8517799  | 8519303  |
| Glyma.11G077200 | Chalcone-flavanone isomerase family protein                                         | Chr11 | 5785880  | 5787797  |
| Glyma.01G166300 | Chalcone-flavanone isomerase family protein                                         | Chr01 | 50402188 | 50404181 |
| Glyma.04G222400 | Chalcone-flavanone isomerase family 3-related                                       | Chr04 | 49304081 | 49306117 |
| Glyma.06G143000 | Chalcone-flavanone isomerase family 3-related                                       | Chr06 | 11642031 | 11644022 |
| Glyma.12G067000 | Cytochrome P450 CYP2 subfamily                                                      | Chr12 | 4909073  | 4911905  |
| Glyma.12G067100 | Cytochrome P450 CYP2 subfamily                                                      | Chr12 | 4919960  | 4922998  |
| Glyma.19G151100 | Dirigent protein 1-related                                                          | Chr19 | 41141615 | 41142515 |

|                 |                                                                                                                        |       |          |          |
|-----------------|------------------------------------------------------------------------------------------------------------------------|-------|----------|----------|
| Glyma.13G173500 | Dirigent protein 1-related                                                                                             | Chr13 | 28761503 | 28763755 |
| Glyma.10G250300 | Dirigent protein 1-related                                                                                             | Chr10 | 47841780 | 47843423 |
| Glyma.19G151200 | Dirigent protein 1-related                                                                                             | Chr19 | 41150640 | 41151405 |
| Glyma.03G147700 | Dirigent protein 1-related                                                                                             | Chr03 | 36329060 | 36329804 |
| Glyma.08G103900 | Flavonoid 3',5'-methyltransferase                                                                                      | Chr08 | 7972204  | 7974378  |
| Glyma.18G267800 | Flavonoid 4'-O-methyltransferase / Isoflavone O-methyltransferase                                                      | Chr18 | 55192276 | 55194120 |
| Glyma.08G246700 | Flavonoid 4'-O-methyltransferase / Isoflavone O-methyltransferase                                                      | Chr08 | 21363198 | 21364914 |
| Glyma.10G176300 | Flavonoid 4'-O-methyltransferase / Isoflavone O-methyltransferase                                                      | Chr10 | 41003284 | 41004506 |
| Glyma.04G227700 | Flavonol 3-O-methyltransferase                                                                                         | Chr04 | 49704598 | 49706834 |
| Glyma.06G137300 | Flavonol 3-O-methyltransferase                                                                                         | Chr06 | 11237072 | 11239469 |
| Glyma.06G137100 | Flavonol 3-O-methyltransferase                                                                                         | Chr06 | 11225188 | 11228664 |
| Glyma.06G110600 | Flavonol synthase (FLS)                                                                                                | Chr06 | 8941619  | 8944385  |
| Glyma.13G082300 | Flavonol synthase (FLS)                                                                                                | Chr13 | 19154278 | 19159357 |
| Glyma.06G128200 | Flavonol synthase / FLS                                                                                                | Chr06 | 10543911 | 10545747 |
| Glyma.07G150900 | Flavonol synthase / FLS                                                                                                | Chr07 | 18177981 | 18182051 |
| Glyma.07G180700 | Flavonol synthase / FLS                                                                                                | Chr07 | 34888861 | 34890596 |
| Glyma.18G201900 | Flavonol synthase / FLS                                                                                                | Chr18 | 48192545 | 48196624 |
| Glyma.07G179800 | Flavonol synthase / FLS // Flavanone 3-dioxygenase / Naringenin,2-oxoglutarate:oxygen oxidoreductase (3-hydroxylating) | Chr07 | 34505933 | 34509654 |
| Glyma.14G163300 | Flavonol synthase 3-related                                                                                            | Chr14 | 40082673 | 40096088 |
| Glyma.20G245100 | Homogentisate phytyltransferase / homogentisate geranylgeranyltransferase (HPT, HGGT, ubiA)                            | Chr20 | 47561270 | 47568860 |
| Glyma.14G098100 | Homogentisate phytyltransferase / homogentisate geranylgeranyltransferase (HPT, HGGT, ubiA)                            | Chr14 | 9259148  | 9266365  |
| Glyma.17G226600 | Homogentisate phytyltransferase / homogentisate geranylgeranyltransferase (HPT, HGGT, ubiA)                            | Chr17 | 38105929 | 38111302 |
| Glyma.10G295300 | Homogentisate phytyltransferase / homogentisate geranylgeranyltransferase (HPT, HGGT, ubiA)                            | Chr10 | 51250135 | 51256351 |
| Glyma.16G149300 | Isoflavone 2'-hydroxylase                                                                                              | Chr16 | 30993255 | 30996642 |
| Glyma.09G049600 | Isoflavone 2'-hydroxylase / Isoflavone 2'-monooxygenase                                                                | Chr09 | 4305877  | 4306472  |
| Glyma.01G190400 | Isoflavone 2'-hydroxylase / Isoflavone 2'-monooxygenase                                                                | Chr01 | 52515056 | 52516522 |
| Glyma.08G089400 | Isoflavone 2'-hydroxylase / Isoflavone 2'-monooxygenase                                                                | Chr08 | 6759742  | 6762340  |
| Glyma.15G156100 | Isoflavone 2'-hydroxylase / Isoflavone 2'-monooxygenase                                                                | Chr15 | 13076997 | 13079333 |
| Glyma.16G149400 | Isoflavone 3'-hydroxylase                                                                                              | Chr16 | 31002000 | 31004110 |
| Glyma.15G156300 | Isoflavone 3'-hydroxylase                                                                                              | Chr15 | 13098492 | 13100036 |
| Glyma.19G030500 | isoflavone 7-O-glucoside-6"-O-malonyltransferase                                                                       | Chr19 | 3779017  | 3781453  |
| Glyma.13G056100 | isoflavone 7-O-glucoside-6"-O-malonyltransferase                                                                       | Chr13 | 15382701 | 15385317 |
| Glyma.09G127200 | Isoflavone 7-O-glucosyltransferase                                                                                     | Chr09 | 31402908 | 31404677 |
| Glyma.09G127300 | Isoflavone 7-O-glucosyltransferase                                                                                     | Chr09 | 31442521 | 31444358 |
| Glyma.09G127700 | Isoflavone 7-O-glucosyltransferase                                                                                     | Chr09 | 31720506 | 31722186 |
| Glyma.16G175600 | isoflavone 7-O-glucosyltransferase                                                                                     | Chr16 | 33709232 | 33710656 |
| Glyma.16G175200 | Isoflavone 7-O-glucosyltransferase                                                                                     | Chr16 | 33654666 | 33656275 |
| Glyma.16G175900 | isoflavone 7-O-glucosyltransferase                                                                                     | Chr16 | 33725875 | 33727942 |

|                 |                                                                                                                   |       |          |          |
|-----------------|-------------------------------------------------------------------------------------------------------------------|-------|----------|----------|
| Glyma.16G175300 | Isoflavone 7-O-glucosyltransferase                                                                                | Chr16 | 33667521 | 33669150 |
| Glyma.16G175400 | Isoflavone 7-O-glucosyltransferase                                                                                | Chr16 | 33682024 | 33683784 |
| Glyma.16G175500 | Isoflavone 7-O-glucosyltransferase                                                                                | Chr16 | 33700402 | 33702163 |
| Glyma.09G094400 | Isoflavone 7-O-methyltransferase                                                                                  | Chr09 | 13197472 | 13199914 |
| Glyma.08G246900 | Isoflavone 7-O-methyltransferase                                                                                  | Chr08 | 21372889 | 21373907 |
| Glyma.20G213500 | Isoflavone 7-O-methyltransferase                                                                                  | Chr20 | 44996231 | 45001230 |
| Glyma.09G094600 | Isoflavone 7-O-methyltransferase                                                                                  | Chr09 | 13248456 | 13250007 |
| Glyma.18G267500 | Isoflavone 7-O-methyltransferase                                                                                  | Chr18 | 55179516 | 55181798 |
| Glyma.08G247000 | Isoflavone 7-O-methyltransferase                                                                                  | Chr08 | 21393885 | 21394984 |
| Glyma.20G213800 | Isoflavone 7-O-methyltransferase                                                                                  | Chr20 | 45012725 | 45013657 |
| Glyma.10G176500 | Isoflavone 7-O-methyltransferase                                                                                  | Chr10 | 41007940 | 41009451 |
| Glyma.20G213700 | Isoflavone 7-O-methyltransferase                                                                                  | Chr20 | 45010959 | 45012474 |
| Glyma.10G176600 | Isoflavone 7-O-methyltransferase                                                                                  | Chr10 | 41013027 | 41014294 |
| Glyma.18G269600 | Isoflavone 7-O-methyltransferase                                                                                  | Chr18 | 55329239 | 55333846 |
| Glyma.10G176700 | Isoflavone 7-O-methyltransferase                                                                                  | Chr10 | 41027227 | 41028670 |
| Glyma.20G027800 | Isoflavone reductase homolog P3-related                                                                           | Chr20 | 3179955  | 3183453  |
| Glyma.08G247100 | Isoflavone-7-O-beta-glucoside 6''-O-malonyltransferase / Flavone/flavonol 7-O-beta-D-glucoside malonyltransferase | Chr08 | 21397696 | 21399123 |
| Glyma.18G268200 | Isoflavone-7-O-beta-glucoside 6''-O-malonyltransferase / Flavone/flavonol 7-O-beta-D-glucoside malonyltransferase | Chr18 | 55220523 | 55222462 |
| Glyma.19G030800 | Isoflavone-7-O-beta-glucoside 6''-O-malonyltransferase / Flavone/flavonol 7-O-beta-D-glucoside malonyltransferase | Chr19 | 3799941  | 3801335  |
| Glyma.19G030700 | Isoflavone-7-O-beta-glucoside 6''-O-malonyltransferase / Flavone/flavonol 7-O-beta-D-glucoside malonyltransferase | Chr19 | 3794404  | 3796426  |
| Glyma.18G268400 | Isoflavone-7-O-beta-glucoside 6''-O-malonyltransferase / Flavone/flavonol 7-O-beta-D-glucoside malonyltransferase | Chr18 | 55227777 | 55229508 |
| Glyma.18G268500 | Isoflavone-7-O-beta-glucoside 6''-O-malonyltransferase / Flavone/flavonol 7-O-beta-D-glucoside malonyltransferase | Chr18 | 55235304 | 55237037 |
| Glyma.18G258000 | Isoflavone-7-O-beta-glucoside 6''-O-malonyltransferase / Flavone/flavonol 7-O-beta-D-glucoside malonyltransferase | Chr18 | 54359057 | 54361006 |
| Glyma.18G268100 | Isoflavone-7-O-beta-glucoside 6''-O-malonyltransferase / Flavone/flavonol 7-O-beta-D-glucoside malonyltransferase | Chr18 | 55215336 | 55216775 |
| Glyma.08G247200 | Isoflavone-7-O-beta-glucoside 6''-O-malonyltransferase / Flavone/flavonol 7-O-beta-D-glucoside malonyltransferase | Chr08 | 21403223 | 21408105 |
| Glyma.13G054000 | Isoflavone-7-O-beta-glucoside 6''-O-malonyltransferase / Flavone/flavonol 7-O-beta-D-glucoside malonyltransferase | Chr13 | 15126544 | 15128286 |
| Glyma.18G267900 | isoflavone-7-O-methyltransferase (7-IOMT)                                                                         | Chr18 | 55199483 | 55200950 |
| Glyma.16G219500 | Methylecgonone reductase                                                                                          | Chr16 | 37677371 | 37680638 |
| Glyma.09G074900 | Naringenin-chalcone synthase / Flavonone synthase                                                                 | Chr09 | 8120501  | 8121567  |

|                 |                                                                 |       |          |          |
|-----------------|-----------------------------------------------------------------|-------|----------|----------|
| Glyma.08G110400 | Naringenin-chalcone synthase / Flavonone synthase               | Chr08 | 8478834  | 8480215  |
| Glyma.03G181700 | Phenylalanine ammonia-lyase                                     | Chr03 | 39362677 | 39366612 |
| Glyma.02G309300 | Phenylalanine ammonia-lyase                                     | Chr02 | 48287101 | 48289732 |
| Glyma.10G058200 | Phenylalanine ammonia-lyase                                     | Chr10 | 5328963  | 5333501  |
| Glyma.20G180800 | Phenylalanine ammonia-lyase                                     | Chr20 | 41891638 | 41898451 |
| Glyma.03G181600 | Phenylalanine ammonia-lyase                                     | Chr03 | 39351927 | 39355288 |
| Glyma.10G209800 | Phenylalanine ammonia-lyase                                     | Chr10 | 44173311 | 44179454 |
| Glyma.19G182300 | Phenylalanine ammonia-lyase                                     | Chr19 | 44118211 | 44122192 |
| Glyma.14G005700 | Polyketide reductase (PKR)                                      | Chr14 | 463009   | 464543   |
| Glyma.07G202300 | SF71 – Dirigent protein 1-related                               | Chr07 | 37166660 | 37169027 |
| Glyma.20G114200 | Trans-cinnamate 4-monooxygenase (CYP73A)                        | Chr20 | 35592130 | 35594408 |
| Glyma.02G236500 | Trans-cinnamate 4-monooxygenase (CYP73A)                        | Chr02 | 42416141 | 42420467 |
| Glyma.14G205200 | Trans-cinnamate 4-monooxygenase (CYP73A)                        | Chr14 | 47041931 | 47046048 |
| Glyma.10G275600 | Trans-cinnamate 4-monooxygenase / Cinnamic acid 4-monooxygenase | Chr10 | 49830805 | 49832699 |
| Glyma.11G010500 | Trans-feruloyl-CoA synthase / Trans-feruloyl-CoA synthetase     | Chr11 | 737013   | 741142   |
| Glyma.01G232400 | Trans-feruloyl-CoA synthase / Trans-feruloyl-CoA synthetase     | Chr01 | 55890929 | 55894888 |
| Glyma.11G091600 | Trans-feruloyl-CoA synthase / Trans-feruloyl-CoA synthetase     | Chr11 | 6929293  | 6933159  |
| Glyma.13G372000 | Trans-feruloyl-CoA synthase / Trans-feruloyl-CoA synthetase     | Chr13 | 45701238 | 45704364 |
| Glyma.15G001700 | Trans-feruloyl-CoA synthase / Trans-feruloyl-CoA synthetase     | Chr15 | 190985   | 194451   |
| Glyma.17G064400 | Trans-feruloyl-CoA synthase / Trans-feruloyl-CoA synthetase     | Chr17 | 4952729  | 4957405  |
| Glyma.17G064500 | Trans-feruloyl-CoA synthase / Trans-feruloyl-CoA synthetase     | Chr17 | 4974218  | 4977314  |
| Glyma.17G064600 | Trans-feruloyl-CoA synthase / Trans-feruloyl-CoA synthetase     | Chr17 | 4988012  | 4993853  |
